# Supplementary material
Source: Research Square preprint supplement (doi:10.21203/rs.3.rs-9211350/v1)
Supplement: Supplementary file 1 [file 6237ed6e295a448a88dea19f.docx]

**Table S3.** Post-hoc mean separation (Tukey CLD) for almond yield components subjected to irrigation regimes and soil-management systems throughout the studied seasons

| Factor |  | Almond yield | | Kernel yield | | Unit weight | | K-S | |
| --- | --- | --- | --- | --- | --- | --- | --- | --- | --- |
|  |  | 2024 | 2025 | 2024 | 2025 | 2024 | 2025 | 2024 | 2025 |
|  |  | (kg ha-1) | | | | (g) | |  |  |
| Irrigation | FI | 5,080a | 5,793a | 1,657a | 1,978a | 1.32a | 1.28a | 0.33a | 0.34a |
|  | RDI | 5,133a | 6,157a | 1,659a | 2,065a | 1.30a | 1.20a | 0.33a | 0.33a |
| Soil-management system | CC | 5,083a | 5,867a | 1,659a | 1,962a | 1.32a | 1.23a | 0.33a | 0.33a |
|  | BS | 5,130a | 6,083a | 1,658a | 2,081a | 1.30a | 1.24a | 0.33a | 0.34a |
| Cultivar | Guara | 3,741b | 4,955b | 1,355b | 1,855b | 1.29b | 1.20b | 0.36a | 0.38a |
|  | Lauranne | 5,703a | 5,558b | 1,998a | 1,942b | 1.10c | 1.10b | 0.35a | 0.35ab |
|  | Marcona | 5,277a | 5,154b | 1,371b | 1,451b | 1.55a | 1.53a | 0.26b | 0.28c |
|  | Marta | 5,705a | 823a | 1,909a | 2,837a | 1.30b | 1.12b | 0.34a | 0.34b |
| Irrigation x Soil-management system | FI x CC | 5,102a | 5,419a | 1,676a | 1,845a | 1.32a | 1.27a | 0.33a | 0.34a |
|  | FI x BS | 5,058a | 6,167a | 1,639a | 2,111a | 1.32a | 1.29a | 0.33a | 0.34a |
|  | RDI x CC | 5,064a | 6,316a | 1,642a | 2,079a | 1.32a | 1.20a | 0.33a | 0.33a |
|  | RDI x BS | 5,203a | 5,998a | 1,677a | 2,050a | 1.28a | 1.20a | 0.33a | 0.34a |
| Guara | FI x CC | 4,042a | 3,519a | 1,507a | 1,350a | 1.30a | 1.20ab | 0.37a | 0.38a |
|  | FI x BS | 3,842a | 4,272ab | 1,416a | 1,673a | 1.31a | 1.41a | 0.37a | 0.39a |
|  | RDI x CC | 3,499a | 5,788ab | 1,236a | 2,003a | 1.30a | 1.05b | 0.35a | 0.34a |
|  | RDI x BS | 3,581a | 6,242a | 1,262a | 2,395a | 1.25a | 1.14ab | 0.35a | 0.38a |
| Lauranne | FI x CC | 6,610a | 5,427a | 2,308a | 1,966a | 1.14a | 1.12a | 0.35a | 0.36a |
|  | FI x BS | 5,482a | 5,579a | 1,900a | 1,930a | 1.07a | 1.10a | 0.35a | 0.34a |
|  | RDI x CC | 4,943a | 6,086a | 1,767a | 2,142a | 1.15a | 1.05a | 0.36a | 0.35a |
|  | RDI x BS | 5,777a | 5,142a | 2,016a | 1,729a | 1.07a | 1.15a | 0.35a | 0.34a |
| Marcona | FI x CC | 4,981a | 5,644a | 1,252a | 1,593a | 1.58a | 1.51a | 0.25a | 0.28a |
|  | FI x BS | 5,198a | 5,458a | 1,347a | 1,561a | 1.56a | 1.52a | 0.26a | 0.29a |
|  | RDI x CC | 4,907a | 4,856a | 1,255a | 1,304a | 1.58a | 1.61a | 0.26a | 0.27a |
|  | RDI x BS | 6,021a | 4,659a | 1,631a | 1,348a | 1.49a | 1.48a | 0.27a | 0.29a |
| Marta | FI x CC | 4,776a | 7,085a | 1,636a | 2,470a | 1.26a | 1.26a | 0.34a | 0.35a |
|  | FI x BS | 5,709a | 9,362a | 1,892a | 3,279a | 1.36a | 1.14a | 0.33a | 0.35a |
|  | RDI x CC | 6,906a | 8,535a | 2,310a | 2,869a | 1.27a | 1.08a | 0.33a | 0.34a |
|  | RDI x BS | 5,431a | 7,950a | 1,799a | 2,730a | 1.32a | 1.03a | 0.33a | 0.34a |
| Cultivar x Irrigation x Soil-management system | Guara x FI x CC | 4,042ab | 3,519e | 1,507a | 1,350b | 1.30c | 1.20c | 0.37a | 0.38a |
| Guara x FI x BS | 3,842ab | 4,272de | 1,416a | 1,673b | 1.31c | 1.41b | 0.37a | 0.39a |
|  | Guara x RDI x CC | 3,499b | 5,788bcde | 1,236a | 2,003ab | 1.30c | 1.05e | 0.35a | 0.34abc |
|  | Guara x RDI x BS | 3,581b | 6,242bcde | 1,262a | 2,395ab | 1.25cd | 1.14cd | 0.35a | 0.38a |
|  | Marta x FI x CC | 4,776ab | 7,085abcd | 1,252a | 2,470ab | 1.58a | 1.26c | 0.25b | 0.35abc |
|  | Marta x FI x BS | 5,709ab | 9,362a | 1,347a | 3,279a | 1.56a | 1.14cd | 0.26b | 0.35abc |
|  | Marta x RDI x CC | 6,906a | 8,535ab | 1,255a | 2,869ab | 1.58a | 1.08de | 0.26b | 0.34abc |
|  | Marta x RDI x BS | 5,431ab | 7,950abc | 1,631a | 2,730ab | 1.49ab | 1.03e | 0.27b | 0.34abc |
|  | Lauranne x FI x CC | 6,610ab | 5,427bcde | 1,636a | 1,966ab | 1.26cd | 1.12d | 0.34ab | 0.36ab |
|  | Lauranne x FI x BS | 5,482ab | 5,579bcde | 1,892a | 1,930ab | 1.36bc | 1.10d | 0.33b | 0.34abc |
|  | Lauranne x RDI x CC | 4,943ab | 6,086abcd | 2,310a | 2,142ab | 1.27cd | 1.05e | 0.33b | 0.35abc |
|  | Lauranne x RDI x BS | 5,777ab | 5,142bcde | 1,799a | 1,729ab | 1.32c | 1.15cd | 0.33b | 0.34abc |
|  | Marcona x FI x CC | 4,981ab | 5,644bcde | 2,308a | 1,593b | 1.14de | 1.51a | 0.35a | 0.28bc |
|  | Marcona x FI x BS | 5,198ab | 5,458bcde | 1,900a | 1,561b | 1.07e | 1.52a | 0.35a | 0.29bc |
|  | Marcona x RDI x CC | 4,907ab | 4,856cde | 1,767a | 1,304b | 1.15de | 1.61a | 0.36a | 0.27c |
|  | Marcona x RDI x BS | 6,021ab | 4,659cde | 2,016a | 1,348b | 1.07e | 1.48ab | 0.35a | 0.29bc |

FI, full irrigation; RDI, regulated deficit irrigation, CC, cover crops, BS, bare soil
