# Supplementary material
Source: Research Square preprint supplement (doi:10.21203/rs.3.rs-9211350/v1)
Supplement: Supplementary file 2 [file 6d30726675e036f910649f82.docx]

**Table S1.** Mean values of gas exchange and stem-water potential during phenological stages for each irrigation strategy, soil-management system, and cultivar combinations. Season 2024.

|  | An | gsw | E | Ci | YStem |
| --- | --- | --- | --- | --- | --- |
|  | (µmol m⁻² s⁻¹) | (mol m⁻² s⁻¹) | mol m-2 s-1 | mmol mol-1 | (MPa) |
|  | Vegetative growth | | | | |
| FI x CC x Guara | 16.3ab | 0.223ab | 0.005abc | 248a | -1.04a |
| FI x CC x Marta | 11.9b | 0.153b | 0.003c | 249a | -0.99a |
| FI x CC x Lauranne | 16.5ab | 0.216ab | 0.005abc | 244a | -1.03a |
| FI x CC x Marcona | 17.2ab | 0.268a | 0.005abc | 261a | -0.96a |
| FI x BS x Guara | 15.0ab | 0.209ab | 0.005abc | 250a | -1.03a |
| FI x BS x Marta | 12.4ab | 0.158ab | 0.004bc | 245a | -1.01a |
| FI x BS x Lauranne | 15.5ab | 0.186ab | 0.005abc | 231a | -1.05a |
| FI x BS x Marcona | 17.6a | 0.246ab | 0.006ab | 245a | -0.98a |
| RDI x CC x Guara | 16.2ab | 0.217ab | 0.006ab | 241a | -1.09a |
| RDI x CC x Marta | 15.5ab | 0.185ab | 0.005abc | 229a | -1.14a |
| RDI x CC x Lauranne | 15.4ab | 0.220ab | 0.006ab | 245a | -1.15a |
| RDI x CC x Marcona | 17.3ab | 0.248ab | 0.006a | 260a | -1.18a |
| RDI x BS x Guara | 13.4ab | 0.182ab | 0.005abc | 248a | -1.08a |
| RDI x BS x Marta | 13.0ab | 0.160ab | 0.005abc | 233a | -1.10a |
| RDI x BS x Lauranne | 16.1ab | 0.220ab | 0.006ab | 245a | -0.99a |
| RDI x BS x Marcona | 14.6ab | 0.228ab | 0.006ab | 260a | -1.01a |
|  | Kernel filling | | | | |
| FI x CC x Guara | 14.61a | 0.183abc | 0.006ab | 227a | -1.17abc |
| FI x CC x Marta | 10.42a | 0.107c | 0.004c | 217a | -1.17abc |
| FI x CC x Lauranne | 14.51a | 0.166abc | 0.005abc | 214a | -1.18abc |
| FI x CC x Marcona | 11.84a | 0.180abc | 0.005abc | 253a | -1.13ab |
| FI x BS x Guara | 10.72a | 0.150abc | 0.005abc | 215a | -1.05a |
| FI x BS x Marta | 10.72a | 0.127bc | 0.004bc | 235a | -1.02a |
| FI x BS x Lauranne | 13.38a | 0.164abc | 0.005abc | 229a | -1.34ab |
| FI x BS x Marcona | 14.97a | 0.216a | 0.007a | 245a | -1.13ab |
| RDI x CC x Guara | 11.98a | 0.138bc | 0.005abc | 221a | -1.48c |
| RDI x CC x Marta | 10.42a | 0.140abc | 0.005abc | 244a | -1.48c |
| RDI x CC x Lauranne | 12.85a | 0.177abc | 0.006ab | 242a | -1.45bc |
| RDI x CC x Marcona | 14.38a | 0.189ab | 0.007a | 233a | -1.43bc |
| RDI x BS x Guara | 13.48a | 0.176abc | 0.006ab | 224a | -1.34abc |
| RDI x BS x Marta | 9.88a | 0.146abc | 0.005abc | 246a | -1.42bc |
| RDI x BS x Lauranne | 11.78a | 0.146abc | 0.005abc | 229a | -1.39bc |
| RDI x BS x Marcona | 11.02a | 0.160abc | 0.006abc | 249a | -1.42bc |
|  | Post harvest | | | | |
| FI x CC x Guara | 6.51a | 0.08abc | 0.003bc | 242a | -1.06a |
| FI x CC x Marta | 4.60a | 0.06c | 0.002c | 254a | -1.04a |
| FI x CC x Lauranne | 8.77a | 0.11abc | 0.004abc | 241a | -1.02a |
| FI x CC x Marcona | 6.50a | 0.12abc | 0.003bc | 275a | -1.21a |
| FI x BS x Guara | 5.93a | 0.08abc | 0.003bc | 259a | -1.09a |
| FI x BS x Marta | 6.98a | 0.08abc | 0.003bc | 232a | -1.03a |
| FI x BS x Lauranne | 8.65a | 0.13ab | 0.004ab | 259a | -1.05a |
| FI x BS x Marcona | 9.15a | 0.12abc | 0.004ab | 236a | -1.12a |
| RDI x CC x Guara | 6.91a | 0.09abc | 0.003bc | 240a | -1.25a |
| RDI x CC x Marta | 5.52a | 0.07bc | 0.003bc | 258a | -1.22a |
| RDI x CC x Lauranne | 9.97a | 0.11abc | 0.004ab | 222a | -1.18a |
| RDI x CC x Marcona | 10.18a | 0.15a | 0.005a | 258a | -1.21a |
| RDI x BS x Guara | 7.83a | 0.10abc | 0.003bc | 238a | -1.23a |
| RDI x BS x Marta | 9.95a | 0.11abc | 0.004ab | 218a | -1.20a |
| RDI x BS x Lauranne | 8.82a | 0.11abc | 0.004ab | 244a | -1.20a |
| RDI x BS x Marcona | 6.32a | 0.10abc | 0.003bc | 267a | -1.35a |

Aₙ, net photosynthesis; gsw, stomatal conductance; E, transpiration; Cᵢ, intercellular CO₂ concentration; ΨStem, stem-water potential; FI, full irrigation; RDI, regulated deficit irrigation, CC, cover crops, BS, bare soil
