# Supplementary material
Source: Research Square preprint supplement (doi:10.21203/rs.3.rs-9211350/v1)
Supplement: Supplementary file 3 [file fddc1ddb7f3f9869908243fa.docx]

**Table S2.** Mean values of gas exchange and stem-water potential during phenological stages for each irrigation strategy, soil-management system, and cultivar combinations. Season 2025.

|  | An | gsw | E | Ci | YStem |
| --- | --- | --- | --- | --- | --- |
|  | (µmol m⁻² s⁻¹) | (mol m⁻² s⁻¹) | (mol m-2 s-1) | (mmol mol-1) | (MPa) |
|  | Vegetative growth | | | | | |
| FI x CC x Guara | 14.84a | 0.24a | 0.004a | 269a | -1.08a |
| FI x CC x Marta | 16.19a | 0.23a | 0.004a | 265a | -1.06a |
| FI x CC x Lauranne | 14.41a | 0.24a | 0.004a | 284a | -1.12a |
| FI x CC x Marcona | 14.60a | 0.24a | 0.004a | 288a | -1.09a |
| FI x BS x Guara | 15.75a | 0.32a | 0.006a | 292a | -1.10a |
| FI x BS x Marta | 14.48a | 0.22a | 0.004a | 271a | -1.11a |
| FI x BS x Lauranne | 16.13a | 0.26a | 0.005a | 268a | -1.09a |
| FI x BS x Marcona | 14.30a | 0.21a | 0.004a | 278a | -1.19a |
| RDI x CC x Guara | 18.37a | 0.24a | 0.005a | 241a | -1.22a |
| RDI x CC x Marta | 13.27a | 0.17a | 0.004a | 249a | -1.35a |
| RDI x CC x Lauranne | 18.96a | 0.28a | 0.005a | 257a | -1.15a |
| RDI x CC x Marcona | 14.56a | 0.18a | 0.004a | 246a | -1.21a |
| RDI x BS x Guara | 18.08a | 0.23a | 0.004a | 237a | -1.19a |
| RDI x BS x Marta | 15.53a | 0.21a | 0.004a | 253a | -1.21a |
| RDI x BS x Lauranne | 17.00a | 0.20a | 0.004a | 238a | -1.15a |
| RDI x BS x Marcona | 16.04a | 0.28a | 0.004a | 282a | -1.22a |
|  | Kernel filling | | | | | |
| FI x CC x Guara | 14.87a | 0.31a | 0.009a | 299ab | -1.28a |
| FI x CC x Marta | 11.37a | 0.17bc | 0.006ab | 275ab | -1.32a |
| FI x CC x Lauranne | 13.24a | 0.22abc | 0.007ab | 275ab | -1.40a |
| FI x CC x Marcona | 9.57a | 0.23abc | 0.007ab | 313a | -1.37a |
| FI x BS x Guara | 13.97a | 0.26ab | 0.008ab | 287ab | -1.26a |
| FI x BS x Marta | 12.54a | 0.20abc | 0.007ab | 272ab | -1.30a |
| FI x BS x Lauranne | 12.51a | 0.20abc | 0.007ab | 268b | -1.34a |
| FI x BS x Marcona | 11.91a | 0.26ab | 0.009ab | 303ab | -1.33a |
| RDI x CC x Guara | 10.29a | 0.15bc | 0.006ab | 262b | -1.77a |
| RDI x CC x Marta | 8.80a | 0.12c | 0.005b | 260b | -1.75a |
| RDI x CC x Lauranne | 11.07a | 0.18abc | 0.007ab | 276ab | -1.64a |
| RDI x CC x Marcona | 10.49a | 0.18abc | 0.006ab | 278ab | -1.51a |
| RDI x BS x Guara | 11.74a | 0.19abc | 0.007ab | 274ab | -1.64a |
| RDI x BS x Marta | 10.56a | 0.18abc | 0.006ab | 278ab | -1.56a |
| RDI x BS x Lauranne | 12.06a | 0.20abc | 0.007ab | 276ab | -1.72a |
| RDI x BS x Marcona | 11.54a | 0.22abc | 0.007ab | 288ab | -1.64a |
|  | Post-harvest | | | | | |
| FI x CC x Guara | 3.87ab | 0.09a | 0.003a | 321a | -1.12ab |
| FI x CC x Marta | 1.82b | 0.08a | 0.003a | 355a | -1.07ab |
| FI x CC x Lauranne | 5.54ab | 0.09a | 0.003a | 299a | -1.03a |
| FI x CC x Marcona | 4.94ab | 0.16a | 0.004a | 338a | -1.11ab |
| FI x BS x Guara | 3.69ab | 0.12a | 0.003a | 334a | -1.14ab |
| FI x BS x Marta | 3.87ab | 0.11a | 0.003a | 329a | -1.07ab |
| FI x BS x Lauranne | 7.55a | 0.17a | 0.005a | 310a | -1.12ab |
| FI x BS x Marcona | 3.85ab | 0.17a | 0.005a | 358a | -1.16ac |
| RDI x CC x Guara | 2.68b | 0.09a | 0.004a | 332a | -1.39bc |
| RDI x CC x Marta | 2.39b | 0.07a | 0.003a | 323a | -1.77de |
| RDI x CC x Lauranne | 5.09ab | 0.12a | 0.005a | 321a | -1.24ab |
| RDI x CC x Marcona | 5.54ab | 0.13a | 0.005a | 314a | -1.69cd |
| RDI x BS x Guara | 2.19b | 0.13a | 0.004a | 356a | -1.60cd |
| RDI x BS x Marta | 2.99b | 0.10a | 0.004a | 334a | -1.35abc |
| RDI x BS x Lauranne | 2.53b | 0.09a | 0.003a | 335a | -1.79ed |
| RDI x BS x Marcona | 4.27ab | 0.17a | 0.005a | 343a | -2.06e |

Aₙ, net photosynthesis; gsw, stomatal conductance; E, transpiration; Cᵢ, intercellular CO₂ concentration; ΨStem, stem-water potential; FI, full irrigation; RDI, regulated deficit irrigation, CC, cover crops, BS, bare soil
